# Supplementary material
Source: publisher figshare collection journal article supplement (https://sage.figshare.com/ndownloader/files/13992587)
Supplement: Supplementary file 2 [file 13992587]

```

1 . *****
2 . *****
3 . *****
4 . ***** APPENDIXES TO THE THE PAPER MODELS/CODE *****
5 . *****
6 . *****
7 . *****
8 .
9 . *****
10 . // Appendix A: Main models, sample since 1980
11 . *****
12 . xtlogit intervention      colhist  llpowerbal logdistance      Oil llpolity2 llrg
    > log ethnic01 intense000 refugees  if year>1980, i(confyear) nolog

```

```

Random-effects logistic regression      Number of obs      =      116801
Group variable: confyear              Number of groups    =         698

```

```

Random effects u_i ~ Gaussian          Obs per group: min =       144
                                           avg  =       167.3
                                           max  =       189

```

```

Integration method: mvaghermite        Integration points =       12

```

```

                                           Wald chi2(9)        =       299.73
Log likelihood = -648.63148             Prob > chi2         =       0.0000

```

| intervention   | Coef.     | Std. Err. | z      | P> z  | [95% Conf. Interval] |           |
|----------------|-----------|-----------|--------|-------|----------------------|-----------|
| colhist        | 2.647566  | .3103749  | 8.53   | 0.000 | 2.039242             | 3.25589   |
| llpowerbal     | -1.227078 | .0752768  | -16.30 | 0.000 | -1.374618            | -1.079539 |
| logdistance    | -1.281732 | .1738551  | -7.37  | 0.000 | -1.622482            | -.9409823 |
| Oil            | .9712504  | .4557653  | 2.13   | 0.033 | .0779668             | 1.864534  |
| llpolity2      | .0076892  | .0335962  | 0.23   | 0.819 | -.0581581            | .0735366  |
| llrgdp96pcalog | .7276323  | .2832661  | 2.57   | 0.010 | .1724411             | 1.282824  |
| ethnic01       | -1.0863   | .3776898  | -2.88  | 0.004 | -1.826558            | -.3460416 |
| intense000     | .0005798  | .0003395  | 1.71   | 0.088 | -.0000856            | .0012451  |
| refugees       | .4828246  | .3846873  | 1.26   | 0.209 | -.2711487            | 1.236798  |
| _cons          | -5.627989 | 2.749672  | -2.05  | 0.041 | -11.01725            | -.2387322 |
| /lnsig2u       | 1.563919  | .2687939  |        |       | 1.037092             | 2.090745  |
| sigma_u        | 2.185751  | .2937582  |        |       | 1.679584             | 2.844458  |
| rho            | .5922009  | .0649135  |        |       | .4616367             | .7109284  |

```

Likelihood-ratio test of rho=0: chibar2(01) =      76.13 Prob >= chibar2 = 0.000

```

```

13 . xtlogit intervention      colhist c.lltrade_gleln  llpowerbal logdistance      0
    > lity2 llrgdp96pcalog ethnic01 intense000 refugees  if year>1980, i(confyear) nolo

```

```

Random-effects logistic regression               Number of obs      =    97624
Group variable: conyear                       Number of groups   =     698

Random effects u_i ~ Gaussian                 Obs per group: min =     37
                                                avg =    139.9
                                                max =    185

Integration method: mvaghermite               Integration points =     12

Log likelihood = -614.87973                     Wald chi2(10)      =    302.32
                                                Prob > chi2        =    0.0000

```

| intervention   | Coef.     | Std. Err. | z      | P> z  | [95% Conf. Interval] |           |
|----------------|-----------|-----------|--------|-------|----------------------|-----------|
| colhist        | 1.932247  | .320209   | 6.03   | 0.000 | 1.304649             | 2.559845  |
| lltrade_gleln  | .4264244  | .0556126  | 7.67   | 0.000 | .3174256             | .5354231  |
| llpowerbal     | -1.085652 | .0776569  | -13.98 | 0.000 | -1.237857            | -.9334475 |
| logdistance    | -1.176294 | .1792522  | -6.56  | 0.000 | -1.527621            | -.8249658 |
| Oil            | .7130079  | .4371304  | 1.63   | 0.103 | -.1437519            | 1.569768  |
| llpolity2      | -.0211545 | .0318947  | -0.66  | 0.507 | -.083667             | .041358   |
| llrgdp96pcalog | .0729613  | .278456   | 0.26   | 0.793 | -.4728024            | .618725   |
| ethnic01       | -.9879934 | .3530807  | -2.80  | 0.005 | -1.680019            | -.2959679 |
| intense000     | .0005128  | .0003281  | 1.56   | 0.118 | -.0001304            | .0011559  |
| refugees       | .6339825  | .3628323  | 1.75   | 0.081 | -.0771556            | 1.345121  |
| _cons          | -2.727451 | 2.706144  | -1.01  | 0.314 | -8.031395            | 2.576493  |
| /lnsig2u       | 1.54018   | .259512   |        |       | 1.031546             | 2.048814  |
| sigma_u        | 2.159961  | .2802679  |        |       | 1.674933             | 2.785444  |
| rho            | .5864558  | .0629382  |        |       | .4602587             | .7022357  |

Likelihood-ratio test of rho=0: chibar2(01) = 77.56 Prob >= chibar2 = 0.000

```

14 . xtlogit intervention colhist c.idealpointdistance llpowerbal logdistance
> llpolity2 llrgdp96pcalog ethnic01 intense000 refugees if year>1980, i(conyear)

```

```

Random-effects logistic regression               Number of obs      =   105099
Group variable: conyear                       Number of groups   =    654

Random effects u_i ~ Gaussian                 Obs per group: min =    137
                                                avg =    160.7
                                                max =    185

Integration method: mvaghermite               Integration points =    12

Log likelihood = -549.14129                     Wald chi2(10)      =    306.13
                                                Prob > chi2        =    0.0000

```

```
15 . xtlogit intervention      colhist  comlang_ethno  llpowerbal logdistance      Oil
    > ty2 llrgdp96pcalog  ethnic01 intense000 refugees  if year>1980, i(confyear) nolog
```

```
Random-effects logistic regression      Number of obs   =   110445
Group variable: confyear             Number of groups =     691
```

```
Random effects u_i ~ Gaussian
```

|                |       |       |
|----------------|-------|-------|
| Obs per group: | min = | 138   |
|                | avg = | 159.8 |
|                | max = | 188   |

Integration method: **mvaghermite**                      Integration points =                      **12**

|                |              |               |          |
|----------------|--------------|---------------|----------|
| Log likelihood | = -615.95592 | Wald chi2(10) | = 309.14 |
|                |              | Prob > chi2   | = 0.0000 |

| intervention   | Coef.     | Std. Err. | z      | P> z  | [95% Conf. Interval] |           |
|----------------|-----------|-----------|--------|-------|----------------------|-----------|
| colhist        | 2.213064  | .3111988  | 7.11   | 0.000 | 1.603125             | 2.823002  |
| comlang_ethno  | 1.422805  | .2391004  | 5.95   | 0.000 | .9541769             | 1.891433  |
| llpowerbal     | -1.21866  | .0756049  | -16.12 | 0.000 | -1.366843            | -1.070477 |
| logdistance    | -1.062369 | .1738677  | -6.11  | 0.000 | -1.403143            | -.7215945 |
| Oil            | 1.13042   | .4371201  | 2.59   | 0.010 | .2736802             | 1.98716   |
| llpolity2      | -.0013439 | .0325043  | -0.04  | 0.967 | -.0650511            | .0623633  |
| llrgdp96pcalog | .6897943  | .2794035  | 2.47   | 0.014 | .1421734             | 1.237415  |
| ethnic01       | -.9689083 | .3653872  | -2.65  | 0.008 | -1.685054            | -.2527625 |





```

21 . xtlogit intervention      c.lltrade_gleln colhist##c.idealpointdistance comlang_e
> lpowerbal logdistance      Oil llpolity2 llrgdp96pcalog ethnic01 intense000 refu
> f year>1980, i(confyyear) nolog

```

```

Random-effects logistic regression      Number of obs      =      82088
Group variable: confyyear             Number of groups    =       647

Random effects u_i ~ Gaussian         Obs per group: min =       34
                                         avg =      126.9
                                         max =      168

Integration method: mvaghermite       Integration points =       12

Wald chi2(13)      =      292.22
Log likelihood = -509.86139              Prob > chi2        =      0.0000

```

| intervention         | Coef.     | Std. Err. | z      | P> z  | [95% Conf. Interva |         |
|----------------------|-----------|-----------|--------|-------|--------------------|---------|
| lltrade_gleln        | .3362157  | .065635   | 5.12   | 0.000 | .2075734           | .4648   |
| 1.colhist            | 2.08083   | .8912783  | 2.33   | 0.020 | .3339562           | 3.8277  |
| idealpointdistance   | .5496523  | .1235953  | 4.45   | 0.000 | .30741             | .79189  |
| colhist#             |           |           |        |       |                    |         |
| c.idealpointdistance |           |           |        |       |                    |         |
| 1                    | -.3028839 | .4075812  | -0.74  | 0.457 | -1.101728          | .49596  |
| comlang_ethno        | .9000344  | .2750461  | 3.27   | 0.001 | .3609539           | 1.4391  |
| llpowerbal           | -.9842051 | .0852678  | -11.54 | 0.000 | -1.151327          | -.81708 |
| logdistance          | -1.277126 | .2059906  | -6.20  | 0.000 | -1.68086           | -.87339 |
| Oil                  | .5585615  | .4233234  | 1.32   | 0.187 | -.2711371          | 1.388   |
| llpolity2            | -.0122729 | .0305848  | -0.40  | 0.688 | -.072218           | .04767  |
| llrgdp96pcalog       | -.1221966 | .2850313  | -0.43  | 0.668 | -.6808478          | .43645  |
| ethnic01             | -.6681961 | .3480442  | -1.92  | 0.055 | -1.35035           | .01395  |
| intense000           | .0003088  | .0003158  | 0.98   | 0.328 | -.0003102          | .00092  |
| refugees             | .807849   | .3627042  | 2.23   | 0.026 | .0969618           | 1.5187  |
| _cons                | -.8262317 | 2.887176  | -0.29  | 0.775 | -6.484992          | 4.8325  |
| /lnsig2u             | 1.248225  | .2982169  |        |       | .6637307           | 1.832   |
| sigma_u              | 1.866589  | .2783242  |        |       | 1.393565           | 2.5001  |
| rho                  | .5143405  | .0744929  |        |       | .3711896           | .65517  |

Likelihood-ratio test of rho=0: chibar2(01) = 47.49 Prob >= chibar2 = 0.000

```

22 . xtlogit intervention      c.lltrade_gleln c.idealpointdistance colhist##c.comlang_
> llpowerbal logdistance      Oil llpolity2 llrgdp96pcalog ethnic01 intense000 ref
> if year>1980, i(confyyear) nolog

```

```

Random-effects logistic regression      Number of obs      =      82088
Group variable: confyear             Number of groups    =       647

Random effects u_i ~ Gaussian        Obs per group: min =       34
                                         avg =      126.9
                                         max =      168

Integration method: mvaghermite      Integration points =       12

Log likelihood = -508.47651           Wald chi2(13)      =      299.71
                                         Prob > chi2        =      0.0000

```

| intervention            | Coef.     | Std. Err. | z      | P> z  | [95% Conf. Inte |      |
|-------------------------|-----------|-----------|--------|-------|-----------------|------|
| lltrade_gleln           | .3323427  | .0654869  | 5.07   | 0.000 | .2039907        | .46  |
| idealpointdistance      | .5248886  | .1209884  | 4.34   | 0.000 | .2877558        | .76  |
| 1.colhist               | 2.024709  | .437341   | 4.63   | 0.000 | 1.167537        | 2.8  |
| comlang_ethno           | 1.074196  | .2884555  | 3.72   | 0.000 | .508834         | 1.6  |
| colhist#c.comlang_ethno |           |           |        |       |                 |      |
| 1                       | -1.188952 | .6537477  | -1.82  | 0.069 | -2.470274       | .09  |
| llpowerbal              | -.9790404 | .0842733  | -11.62 | 0.000 | -1.144213       | -.81 |
| logdistance             | -1.235616 | .2065632  | -5.98  | 0.000 | -1.640473       | -.83 |
| Oil                     | .6246194  | .4220681  | 1.48   | 0.139 | -.2026189       | 1.4  |
| llpolity2               | -.0161684 | .0305512  | -0.53  | 0.597 | -.0760477       | .04  |
| llrgdp96pcalog          | -.1045669 | .283647   | -0.37  | 0.712 | -.6605047       | .4   |
| ethnic01                | -.6272659 | .3463061  | -1.81  | 0.070 | -1.306013       | .05  |
| intense000              | .0002658  | .0003125  | 0.85   | 0.395 | -.0003466       | .00  |
| refugees                | .7512518  | .3611719  | 2.08   | 0.038 | .0433678        | 1.4  |
| _cons                   | -1.241179 | 2.88998   | -0.43  | 0.668 | -6.905437       | 4.4  |
| /lnsig2u                | 1.226937  | .2978621  |        |       | .6431382        | 1.8  |
| sigma_u                 | 1.846826  | .2750497  |        |       | 1.37929         | 2.4  |
| rho                     | .5090214  | .0744413  |        |       | .366396         | .65  |

Likelihood-ratio test of rho=0: chibar2(01) = **46.87** Prob >= chibar2 = **0.000**

```

23 . *****
24 . // Appendix C: Main models, sample since 1980 - Civil Wars in former colonies ONLY
25 . *****
26 . xtlogit intervention      colhist      llpowerbal logdistance      Oil llpolity2 llrg
    > log ethnic01 intense000 refugees      if year>1980 & formercolony==1, i(confyear) nol

```

```

Random-effects logistic regression      Number of obs      =      97252
Group variable: confyear             Number of groups    =       579

```

Random effects u\_i ~ **Gaussian**

Obs per group: min = 1  
 avg = 168.0  
 max = 189

Integration method: **mvaghermite**

Integration points = 12

Log likelihood = -613.77131

Wald chi2(9) = 284.36  
 Prob > chi2 = 0.0000

| intervention   | Coef.     | Std. Err. | z      | P> z  | [95% Conf. Interval] |           |
|----------------|-----------|-----------|--------|-------|----------------------|-----------|
| colhist        | 2.621401  | .3108414  | 8.43   | 0.000 | 2.012163             | 3.230639  |
| llpowerbal     | -1.237832 | .0778863  | -15.89 | 0.000 | -1.390486            | -1.085178 |
| logdistance    | -1.23223  | .1804468  | -6.83  | 0.000 | -1.585899            | -.8785607 |
| Oil            | .9417579  | .46292    | 2.03   | 0.042 | .0344514             | 1.849064  |
| llpolity2      | .0217573  | .0340421  | 0.64   | 0.523 | -.044964             | .0884786  |
| llrgdp96pcalog | .9287084  | .3188971  | 2.91   | 0.004 | .3036814             | 1.553735  |
| ethnic01       | -.9932295 | .3844591  | -2.58  | 0.010 | -1.746756            | -.2397035 |
| intense000     | .000553   | .0003404  | 1.62   | 0.104 | -.0001141            | .0012202  |
| refugees       | .6832879  | .4055046  | 1.69   | 0.092 | -.1114866            | 1.478062  |
| _cons          | -7.592503 | 2.97402   | -2.55  | 0.011 | -13.42148            | -1.76353  |
| /lnsig2u       | 1.535329  | .2799601  |        |       | .9866178             | 2.084041  |
| sigma_u        | 2.154729  | .301619   |        |       | 1.637726             | 2.834939  |
| rho            | .5852788  | .067954   |        |       | .4491193             | .7095488  |

Likelihood-ratio test of rho=0: chibar2(01) = 69.11 Prob >= chibar2 = 0.000

```
27 . xtlogit intervention colhist c.lltrade_gleln llpowerbal logdistance 0
> lity2 llrgdp96pcalog ethnic01 intense000 refugees if year>1980 & formercolony==1
> fyear) nolog
```

Random-effects logistic regression

Number of obs = 80995

Group variable: **conffyear**

Number of groups = 579

Random effects u\_i ~ **Gaussian**

Obs per group: min = 1  
 avg = 139.9  
 max = 185

Integration method: **mvaghermite**

Integration points = 12

Log likelihood = -576.44177

Wald chi2(10) = 286.27  
 Prob > chi2 = 0.0000

| intervention | Coef. | Std. Err. | z | P> z | [95% Conf. Interval] |  |
|--------------|-------|-----------|---|------|----------------------|--|
|              |       |           |   |      |                      |  |





```
29 . xtlogit intervention      colhist  comlang_ethno  llpowerbal logdistance      Oil
    > ty2 llrgdp96pcalog  ethnic01 intense000 refugees  if year>1980 & formercolony ==1,
    > year) nolog
```

```
Random effects u_i ~ Gaussian               Obs per group: min =      142
                                           avg =     160.7
                                           max =     188
```

|                |              |               |          |
|----------------|--------------|---------------|----------|
| Log likelihood | = -587.71338 | Wald chi2(10) | = 296.12 |
|                |              | Prob > chi2   | = 0.0000 |

| intervention   | Coef.     | Std. Err. | z      | P> z  | [95% Conf. Interval] |           |
|----------------|-----------|-----------|--------|-------|----------------------|-----------|
| colhist        | 2.166573  | .3115904  | 6.95   | 0.000 | 1.555867             | 2.777279  |
| comlang_ethno  | 1.505516  | .2488071  | 6.05   | 0.000 | 1.017863             | 1.993169  |
| llpowerbal     | -1.234545 | .0779089  | -15.85 | 0.000 | -1.387243            | -1.081846 |
| logdistance    | -.9750907 | .1784309  | -5.46  | 0.000 | -1.324809            | -.6253726 |
| Oil            | 1.078685  | .436658   | 2.47   | 0.013 | .2228513             | 1.934519  |
| llpolity2      | .0115245  | .0323732  | 0.36   | 0.722 | -.0519258            | .0749749  |
| llrgdp96pcalog | .8864515  | .3051637  | 2.90   | 0.004 | .2883416             | 1.484561  |
| ethnic01       | -.7397791 | .3647647  | -2.03  | 0.043 | -1.454705            | -.0248534 |
| intense000     | .0005199  | .0003274  | 1.59   | 0.112 | -.0001219            | .0011616  |
| refugees       | 1.045262  | .3945744  | 2.65   | 0.008 | .2719104             | 1.818614  |
| _cons          | -9.8502   | 2.904189  | -3.39  | 0.001 | -15.54231            | -4.158094 |
| /lnsig2u       | 1.359804  | .2827265  |        |       | .8056698             | 1.913937  |
| sigma_u        | 1.973684  | .2790064  |        |       | 1.49606              | 2.603792  |
| rho            | .5421388  | .0701796  |        |       | .4048787             | .6732871  |

```
30 . xtlogit intervention      colhist c.lltrade_gleln idealpointdistance comlang_ethno
> rbal logdistance          Oil llpolity2 llrgdp96pcalog  ethnic01 intense000 refugee
> ear>1980 & formercolony ==1, i(confyear) nolog
```

```

Random-effects logistic regression      Number of obs      =      67646
Group variable: confyear              Number of groups    =       533

Random effects u_i ~ Gaussian          Obs per group: min =       34
                                           avg  =      126.9
                                           max  =      168

Integration method: mvaghermite        Integration points =       12

Log likelihood = -497.53294             Wald chi2(12)      =      279.99
                                           Prob > chi2        =      0.0000

```

| intervention       | Coef.     | Std. Err. | z      | P> z  | [95% Conf. Interval] |           |
|--------------------|-----------|-----------|--------|-------|----------------------|-----------|
| colhist            | 1.361429  | .3351308  | 4.06   | 0.000 | .7045844             | 2.018273  |
| lltrade_gleln      | .3556879  | .0678073  | 5.25   | 0.000 | .2227881             | .4885878  |
| idealpointdistance | .5250249  | .1243501  | 4.22   | 0.000 | .2813032             | .7687465  |
| comlang_ethno      | .849582   | .2824609  | 3.01   | 0.003 | .2959688             | 1.403195  |
| llpowerbal         | -.9697239 | .0856711  | -11.32 | 0.000 | -1.137636            | -.8018116 |
| logdistance        | -1.309596 | .209598   | -6.25  | 0.000 | -1.720401            | -.8987917 |
| Oil                | .419153   | .4286371  | 0.98   | 0.328 | -.4209603            | 1.259266  |
| llpolity2          | -.0015615 | .0305349  | -0.05  | 0.959 | -.0614088            | .0582857  |
| llrgdp96pcalog     | .0520892  | .3121678  | 0.17   | 0.867 | -.5597486            | .6639269  |
| ethnic01           | -.4721087 | .3489744  | -1.35  | 0.176 | -1.156086            | .2118686  |
| intense000         | .000242   | .0003158  | 0.77   | 0.444 | -.000377             | .000861   |
| refugees           | 1.006418  | .3756294  | 2.68   | 0.007 | .2701982             | 1.742638  |
| _cons              | -1.8404   | 3.04983   | -0.60  | 0.546 | -7.817957            | 4.137157  |
| /lnsig2u           | 1.233472  | .3044432  |        |       | .6367741             | 1.830169  |
| sigma_u            | 1.85287   | .2820468  |        |       | 1.374908             | 2.496987  |
| rho                | .5106545  | .0760762  |        |       | .3649199             | .6546002  |

Likelihood-ratio test of rho=0: chibar2(01) = 46.46 Prob >= chibar2 = 0.000

```

31 . *****
32 . // Appendix D: Conditional Models, sample since 1980 - Civil wars in former coloni
33 . *****
34 . xtlogit intervention      c.lltrade_gleln##colhist c.idealpointdistance comlang_e
> lpowerbal logdistance      Oil llpolity2 llrgdp96pcalog ethnic01 intense000 refu
> f year>1980 & formercolony ==1, i(confyear) nolog

```

```

Random-effects logistic regression      Number of obs      =      67646
Group variable: confyear              Number of groups    =       533

Random effects u_i ~ Gaussian          Obs per group: min =       34
                                           avg  =      126.9

```

max = 168

Integration method: **mvaghermite**

Integration points = 12

Log likelihood = **-492.02253**

Wald chi2(13) = 287.23

Prob &gt; chi2 = 0.0000

| intervention            | Coef.     | Std. Err. | z      | P> z  | [95% Conf. Inte |      |
|-------------------------|-----------|-----------|--------|-------|-----------------|------|
| lltrade_gleln           | .3950575  | .0685356  | 5.76   | 0.000 | .2607301        | .52  |
| 1.colhist               | 4.203754  | .8933345  | 4.71   | 0.000 | 2.45285         | 5.9  |
| colhist#c.lltrade_gleln |           |           |        |       |                 |      |
| 1                       | -.6142319 | .1916647  | -3.20  | 0.001 | -.9898878       | -.2  |
| idealpointdistance      | .5181713  | .124405   | 4.17   | 0.000 | .274342         | .76  |
| comlang_ethno           | .9403998  | .2787845  | 3.37   | 0.001 | .3939922        | 1.4  |
| llpowerbal              | -.9449699 | .0860261  | -10.98 | 0.000 | -1.113578       | -.77 |
| logdistance             | -1.319707 | .2071317  | -6.37  | 0.000 | -1.725678       | -.91 |
| Oil                     | .4938295  | .4208632  | 1.17   | 0.241 | -.3310472       | 1.3  |
| llpolity2               | -.0111214 | .0301371  | -0.37  | 0.712 | -.0701891       | .04  |
| llrgdp96pcalog          | .0465617  | .3045879  | 0.15   | 0.879 | -.5504197       | .6   |
| ethnic01                | -.3516767 | .3427155  | -1.03  | 0.305 | -1.023387       | .32  |
| intense000              | .0002491  | .0003095  | 0.80   | 0.421 | -.0003575       | .00  |
| refugees                | .9523207  | .3653715  | 2.61   | 0.009 | .2362057        | 1.6  |
| _cons                   | -1.801822 | 2.981089  | -0.60  | 0.546 | -7.644648       | 4.0  |
| /lnsig2u                | 1.155681  | .3056189  |        |       | .5566795        | 1.7  |
| sigma_u                 | 1.782186  | .2723348  |        |       | 1.320935        | 2.4  |
| rho                     | .4912094  | .0763811  |        |       | .3465661        | .63  |

Likelihood-ratio test of rho=0: chibar2(01) = 43.27 Prob >= chibar2 = 0.000

```

35 . xtlogit intervention      c.lltrade_gleln colhist##c.idealpointdistance comlang_e
> lpowerbal logdistance      Oil llpolity2 llrgdp96pcalog ethnic01 intense000 refu
> f year>1980 & formercolony ==1, i(confyear) nolog

```

Random-effects logistic regression

Number of obs = 67646

Group variable: **confyear**

Number of groups = 533

Random effects u\_i ~ **Gaussian**

Obs per group: min = 34

avg = 126.9

max = 168

Integration method: **mvaghermite**

Integration points = 12

Wald chi2(13) = 281.83

Log likelihood = **-497.29822**

Prob &gt; chi2

= **0.0000**

| intervention         | Coef.     | Std. Err. | z      | P> z  | [95% Conf. Interva |         |
|----------------------|-----------|-----------|--------|-------|--------------------|---------|
| lltrade_gleln        | .3546938  | .0675721  | 5.25   | 0.000 | .222255            | .48713  |
| 1.colhist            | 1.943097  | .8930873  | 2.18   | 0.030 | .1926779           | 3.6935  |
| idealpointdistance   | .5410167  | .1266081  | 4.27   | 0.000 | .2928694           | .78916  |
| colhist#             |           |           |        |       |                    |         |
| c.idealpointdistance |           |           |        |       |                    |         |
| 1                    | -.2828263 | .4095655  | -0.69  | 0.490 | -1.08556           | .51990  |
| comlang_ethno        | .8744489  | .2840529  | 3.08   | 0.002 | .3177155           | 1.4311  |
| llpowerbal           | -.9604183 | .086624   | -11.09 | 0.000 | -1.130198          | -.79063 |
| logdistance          | -1.300118 | .2095255  | -6.21  | 0.000 | -1.710781          | -.8894  |
| Oil                  | .4285159  | .4277136  | 1.00   | 0.316 | -.4097873          | 1.2668  |
| llpolity2            | -.0015183 | .0304391  | -0.05  | 0.960 | -.0611779          | .05814  |
| llrgdp96pcalog       | .0363595  | .3119117  | 0.12   | 0.907 | -.5749761          | .64769  |
| ethnic01             | -.4469464 | .3498126  | -1.28  | 0.201 | -1.132566          | .23867  |
| intense000           | .0002612  | .0003163  | 0.83   | 0.409 | -.0003587          | .0008   |
| refugees             | .9902452  | .3753999  | 2.64   | 0.008 | .254475            | 1.7260  |
| _cons                | -1.801301 | 3.042489  | -0.59  | 0.554 | -7.764469          | 4.1618  |
| /lnsig2u             | 1.223609  | .3054762  |        |       | .6248868           | 1.8223  |
| sigma_u              | 1.843756  | .2816117  |        |       | 1.366761           | 2.487   |
| rho                  | .5081897  | .0763486  |        |       | .3621694           | .65282  |

Likelihood-ratio test of rho=0: chibar2(01) = **45.71** Prob >= chibar2 = **0.000**

```

36 . xtlogit intervention      c.lltrade_gleln c.idealpointdistance colhist##c.comlang_
> llpowerbal logdistance      Oil llpolity2 llrgdp96pcalog ethnic01 intense000 ref
> if year>1980 & formercolony ==1, i(confyear) nolog

```

Random-effects logistic regression  
Group variable: **confyear**

Number of obs = **67646**  
Number of groups = **533**

Random effects u\_i ~ **Gaussian**

Obs per group: min = **34**  
avg = **126.9**  
max = **168**

Integration method: **mvaghermite**Integration points = **12**Log likelihood = **-496.00243**

Wald chi2(13) = **288.97**  
Prob > chi2 = **0.0000**

| intervention | Coef. | Std. Err. | z | P> z | [95% Conf. Inte |  |
|--------------|-------|-----------|---|------|-----------------|--|
|--------------|-------|-----------|---|------|-----------------|--|

```

37 .
38 . *****
39 . // Appendix E: Conditional Models Substituting Trade with Trade Dependence
40 . *****
41 .
42 . xtlogit intervention      c.lltrade_depBgle##colhist c.idealpointdistance  comlang_
    > llpowerbal logdistance      Oil llpolity2 llrgdp96pcalog  ethnic01 intense000 ref
    > if year>1980 & formercolony==1, i(confyear) nolog

```

|                                        |                    |   |        |
|----------------------------------------|--------------------|---|--------|
| Random-effects logistic regression     | Number of obs      | = | 67434  |
| Group variable: <b>confyear</b>        | Number of groups   | = | 533    |
| Random effects u_i ~ <b>Gaussian</b>   | Obs per group: min | = | 34     |
|                                        | avg                | = | 126.5  |
|                                        | max                | = | 167    |
| Integration method: <b>mvaghermite</b> | Integration points | = | 12     |
|                                        | Wald chi2(13)      | = | 306.42 |
| Log likelihood = <b>-507.32544</b>     | Prob > chi2        | = | 0.0000 |

| intervention | Coef. | Std. Err. | z | P> z | [95% Conf. Interval] |
|--------------|-------|-----------|---|------|----------------------|
|--------------|-------|-----------|---|------|----------------------|







```
47 . est store m3
```

```

48 .
49 . *****
50 . // Appendix F: Conditional Models ADDING MAJOR POWER INTERVENER
51 . *****
52 .
53 .
54 . xtlogit intervention    majpow    c.lltrade_gleln##colhist c.idealpointdistance    coml
    > no    llpowerbal logdistance    Oil llpolity2 llrgdp96pcalog    ethnic01 intense000
    > es    if year>1980 & formercolony==1 , i(confyear) nolog

```

|                                    |                  |   |              |
|------------------------------------|------------------|---|--------------|
| Random-effects logistic regression | Number of obs    | = | <b>67646</b> |
| Group variable: <b>confyear</b>    | Number of groups | = | <b>533</b>   |

```
Random effects u_i ~ Gaussian
```

|                |       |       |
|----------------|-------|-------|
| Obs per group: | min = | 34    |
|                | avg = | 126.9 |
|                | max = | 168   |

```
Integration method: mvaghermite           Integration points =      12
```

|                |              |               |          |
|----------------|--------------|---------------|----------|
| Log likelihood | = -476.97922 | Wald chi2(14) | = 307.66 |
|                |              | Prob > chi2   | = 0.0000 |

| intervention | Coef. | Std. Err. | z | P> z | [95% Conf. Inte |
|--------------|-------|-----------|---|------|-----------------|
|--------------|-------|-----------|---|------|-----------------|

|                         |           |          |       |       |           |      |
|-------------------------|-----------|----------|-------|-------|-----------|------|
| majpow                  | 1.874859  | .3631165 | 5.16  | 0.000 | 1.163164  | 2.5  |
| lltrade_gleln           | .3377389  | .0720343 | 4.69  | 0.000 | .1965542  | .47  |
| 1.colhist               | 4.399146  | .9363089 | 4.70  | 0.000 | 2.564015  | 6.2  |
| colhist#c.lltrade_gleln |           |          |       |       |           |      |
| 1                       | -.7288458 | .1967069 | -3.71 | 0.000 | -1.114384 | -.34 |
| idealpointdistance      | .3180894  | .1277237 | 2.49  | 0.013 | .0677555  | .56  |
| comlang_ethno           | 1.048029  | .2950607 | 3.55  | 0.000 | .4697203  | 1.6  |
| llpowerbal              | -.6552678 | .093389  | -7.02 | 0.000 | -.8383069 | -.47 |
| logdistance             | -1.379454 | .2148064 | -6.42 | 0.000 | -1.800466 | -.95 |
| Oil                     | .4354661  | .4203091 | 1.04  | 0.300 | -.3883247 | 1.2  |
| llpolity2               | -.010289  | .029889  | -0.34 | 0.731 | -.0688704 | .04  |
| llrgdp96pcalog          | -.0895636 | .3023438 | -0.30 | 0.767 | -.6821466 | .50  |
| ethnic01                | -.3686206 | .3400045 | -1.08 | 0.278 | -1.035017 | .2   |
| intense000              | .000214   | .0003095 | 0.69  | 0.489 | -.0003926 | .00  |
| refugees                | .9318202  | .3648219 | 2.55  | 0.011 | .2167825  | 1.6  |
| _cons                   | .1453355  | 3.020322 | 0.05  | 0.962 | -5.774387 | 6.0  |
| /lnsig2u                | 1.18159   | .3008821 |       |       | .591872   | 1.7  |
| sigma_u                 | 1.805423  | .2716097 |       |       | 1.344384  | 2.   |
| rho                     | .4976856  | .0752189 |       |       | .3545781  | .64  |

Likelihood-ratio test of rho=0: chibar2(01) = **44.47** Prob >= chibar2 = **0.000**

```
55 . est store m4
```

```
56 . xtlogit intervention    majpow    c.lltrade_gleln colhist##c.idealpointdistance com
> hno llpowerbal logdistance      Oil llpolity2 llrgdp96pcalog ethnic01 intense00
> ees if year>1980 & formercolony==1 , i(confyear) nolog
```

```
Random-effects logistic regression      Number of obs   =   67646
Group variable: confyear              Number of groups =    533
```

|                               |                      |       |
|-------------------------------|----------------------|-------|
| Random effects u_i ~ Gaussian | Obs per group: min = | 34    |
|                               | avg =                | 126.9 |
|                               | max =                | 168   |

Integration method: **mvaghermite**                      Integration points =                      **12**

|                             |             |          |   |        |
|-----------------------------|-------------|----------|---|--------|
|                             | Wald        | chi2(14) | = | 307.82 |
| Log likelihood = -483.68614 | Prob > chi2 |          | = | 0.0000 |

| intervention  | Coef.           | Std. Err.       | z           | P> z         | [95% Conf. Interva            |
|---------------|-----------------|-----------------|-------------|--------------|-------------------------------|
| majpow        | <b>1.783006</b> | <b>.3608714</b> | <b>4.94</b> | <b>0.000</b> | <b>1.075712</b> <b>2.4903</b> |
| 11trade gleln | <b>.2899772</b> | <b>.0713256</b> | <b>4.07</b> | <b>0.000</b> | <b>.1501817</b> <b>.42977</b> |



|                         |           |          |       |       |           |      |
|-------------------------|-----------|----------|-------|-------|-----------|------|
| 1.colhist               | 1.539109  | .4545192 | 3.39  | 0.001 | .6482672  | 2.   |
| comlang_ethno           | 1.123943  | .3131829 | 3.59  | 0.000 | .5101155  | 1.   |
| colhist#c.comlang_ethno |           |          |       |       |           |      |
| 1                       | -1.289974 | .676237  | -1.91 | 0.056 | -2.615374 | .03  |
| 11powerbal              | -.6879908 | .0929296 | -7.40 | 0.000 | -.8701295 | -.50 |
| logdistance             | -1.322446 | .2160027 | -6.12 | 0.000 | -1.745804 | -.89 |
| Oil                     | .4304474  | .424648  | 1.01  | 0.311 | -.4018474 | 1.2  |
| 11polity2               | -.0050128 | .0299967 | -0.17 | 0.867 | -.0638052 | .05  |
| 11rgdp96pcalog          | -.1022491 | .3060283 | -0.33 | 0.738 | -.7020534 | .49  |
| ethnic01                | -.4359694 | .3448224 | -1.26 | 0.206 | -1.111809 | .23  |
| intense000              | .0001667  | .0003111 | 0.54  | 0.592 | -.000443  | .00  |
| refugees                | .9226571  | .3722806 | 2.48  | 0.013 | .1930006  | 1.6  |
| _cons                   | -.0804146 | 3.071221 | -0.03 | 0.979 | -6.099897 | 5.9  |
| /lnsig2u                | 1.207545  | .303502  |       |       | .6126925  | 1.8  |
| sigma_u                 | 1.829006  | .2775535 |       |       | 1.358453  | 2.4  |
| rho                     | .5041744  | .0758702 |       |       | .3593572  | .64  |

Likelihood-ratio test of rho=0: chibar2(01) = **45.05** Prob >= chibar2 = **0.000**

```
59 . est store m6
```

60 .

61 .

62 . \*\*\*\*\*

63 . // Appendix G: DEFENSIVE ALLIANCE

64 . \*\*\*\*\*

65 .

```
66 . xtlogit intervention      c.lltrade_gleln##colhist llalliance_best  comlang_ethno
> bal logdistance           Oil llpolity2 llrgdp96pcalog  ethnic01 intense000 refugees
> >1980 & formercolony==1, i(confyear) nolog
```

```
Random-effects logistic regression      Number of obs   =    75716
Group variable: confyear              Number of groups =     572
```

```
Random effects u_i ~ Gaussian
```

|                |       |       |
|----------------|-------|-------|
| Obs per group: | min = | 36    |
|                | avg = | 132.4 |
|                | max = | 175   |

Integration method: **mvaghermite**      Integration points =      **12**

|                |              |               |          |
|----------------|--------------|---------------|----------|
| Log likelihood | = -553.56255 | Wald chi2(13) | = 311.50 |
|                |              | Prob > chi2   | = 0.0000 |

| intervention | Coef. | Std. Err. | z | P> z | [95% Conf. Inte |
|--------------|-------|-----------|---|------|-----------------|
|--------------|-------|-----------|---|------|-----------------|

|                         |           |          |        |       |           |      |
|-------------------------|-----------|----------|--------|-------|-----------|------|
| 11trade_gleln           | .4194693  | .0600752 | 6.98   | 0.000 | .301724   | .53  |
| 1.colhist               | 3.891986  | .8886803 | 4.38   | 0.000 | 2.150204  | 5.6  |
| colhist#c.11trade_gleln |           |          |        |       |           |      |
| 1                       | -.4549512 | .1865421 | -2.44  | 0.015 | -.8205671 | -.08 |
| 11alliance_best         | .9075925  | .3998706 | 2.27   | 0.023 | .1238605  | 1.6  |
| comlang_ethno           | .8088033  | .2971824 | 2.72   | 0.006 | .2263365  | 1.   |
| 11powerbal              | -1.037525 | .0804383 | -12.90 | 0.000 | -1.195181 | -.87 |
| logdistance             | -.8678074 | .1951834 | -4.45  | 0.000 | -1.25036  | -.48 |
| Oil                     | .9034723  | .4152585 | 2.18   | 0.030 | .0895806  | 1.7  |
| 11polity2               | -.0254155 | .030546  | -0.83  | 0.405 | -.0852845 | .03  |
| 11rgdp96pcalog          | .2562542  | .2982902 | 0.86   | 0.390 | -.3283839 | .84  |
| ethnic01                | -.3828098 | .3485346 | -1.10  | 0.272 | -1.065925 | .30  |
| intense000              | .0004331  | .0003092 | 1.40   | 0.161 | -.000173  | .00  |
| refugees                | 1.041209  | .3674849 | 2.83   | 0.005 | .3209519  | 1.7  |
| _cons                   | -6.852833 | 2.844639 | -2.41  | 0.016 | -12.42822 | -1.2 |
| /lnsig2u                | 1.262557  | .2882784 |        |       | .6975421  | 1.8  |
| sigma_u                 | 1.880013  | .2709836 |        |       | 1.417325  | 2.4  |
| rho                     | .5179198  | .071977  |        |       | .3791152  | .65  |

Likelihood-ratio test of rho=0: chibar2(01) = 50.95 Prob >= chibar2 = 0.000

67 . est store m7

68 . xtlogit intervention c.11trade\_gleln colhist##c.11alliance\_best comlang\_ethno  
> erbal logdistance Oil 11polity2 11rgdp96pcalog ethnic01 intense000 refugees  
> ar>1980 & formercolony==1, i(confyear) nolog  
note: 1.colhist#c.11alliance\_best != 0 predicts failure perfectly  
1.colhist#c.11alliance\_best dropped and 4 obs not used

|                                        |                    |   |        |
|----------------------------------------|--------------------|---|--------|
| Random-effects logistic regression     | Number of obs      | = | 75712  |
| Group variable: <b>confyear</b>        | Number of groups   | = | 572    |
| Random effects u_i ~ <b>Gaussian</b>   | Obs per group: min | = | 36     |
|                                        | avg                | = | 132.4  |
|                                        | max                | = | 175    |
| Integration method: <b>mvaghermite</b> | Integration points | = | 12     |
| Log likelihood = <b>-554.45464</b>     | Wald chi2(12)      | = | 312.60 |
|                                        | Prob > chi2        | = | 0.0000 |

| intervention | Coef. | Std. Err. | z | P> z | [95% Conf. Interval] |
|--------------|-------|-----------|---|------|----------------------|
|--------------|-------|-----------|---|------|----------------------|





```
78 . est store m10
```

|                |              |               |          |
|----------------|--------------|---------------|----------|
| Log likelihood | = -483.52709 | Wald chi2(13) | = 232.40 |
|                |              | Prob > chi2   | = 0.0000 |

| intervention  | Coef.    | Std. Err. | z    | P> z  | [95% Conf. Interva |
|---------------|----------|-----------|------|-------|--------------------|
| 1ltrade_gleln | .3332237 | .0652301  | 5.11 | 0.000 | .2053751 .46107    |
| 1.colhist     | 2.384006 | .9580414  | 2.49 | 0.013 | .5062795 4.2617    |



```
80 . est store m11
```

|                |              |               |          |
|----------------|--------------|---------------|----------|
| Log likelihood | = -482.76695 | Wald chi2(13) | = 233.32 |
|                |              | Prob > chi2   | = 0.0000 |

| intervention       | Coef.    | Std. Err. | z    | P> z  | [95% Conf. Inte |     |
|--------------------|----------|-----------|------|-------|-----------------|-----|
| lltrade_gleln      | .337432  | .0652388  | 5.17 | 0.000 | .2095663        | .46 |
| idealpointdistance | .4678666 | .1192351  | 3.92 | 0.000 | .2341701        | .7  |
| comlang_ethno      | .9940377 | .3005691  | 3.31 | 0.001 | .404933         | 1.5 |
| 1.colhist          | 1.943187 | .4563327  | 4.26 | 0.000 | 1.048791        | 2.8 |



|                          |           |          |        |       |           |     |
|--------------------------|-----------|----------|--------|-------|-----------|-----|
| c.l1impabgleln#c.colhist | -.6428605 | .2017297 | -3.19  | 0.001 | -1.038244 | -.2 |
| idealpointdistance       | .5418342  | .1218564 | 4.45   | 0.000 | .3030001  | .7  |
| comlang_ethno            | .9148605  | .2806547 | 3.26   | 0.001 | .3647874  | 1.  |
| l1powerbal               | -.9547274 | .0867947 | -11.00 | 0.000 | -1.124842 | -.7 |
| logdistance              | -1.323553 | .2115163 | -6.26  | 0.000 | -1.738117 | -.9 |
| Oil                      | .6281065  | .4226314 | 1.49   | 0.137 | -.2002357 | 1.  |
| l1polity2                | -.0093328 | .030278  | -0.31  | 0.758 | -.0686766 | .0  |
| l1rgdp96pcalog           | -.0768748 | .3130473 | -0.25  | 0.806 | -.6904361 | .5  |
| ethnic01                 | -.3633542 | .3452662 | -1.05  | 0.293 | -1.040064 | .3  |
| intense000               | .0002524  | .0003123 | 0.81   | 0.419 | -.0003596 | .0  |
| refugees                 | .9403642  | .3680625 | 2.55   | 0.011 | .218975   | 1.  |
| _cons                    | -.9444834 | 3.037005 | -0.31  | 0.756 | -6.896905 | 5.  |
| /lnsig2u                 | 1.189819  | .302645  |        |       | .5966452  | 1.  |
| sigma_u                  | 1.812866  | .2743275 |        |       | 1.347596  | 2.  |
| rho                      | .4997428  | .0756612 |        |       | .3556712  | .   |

Likelihood-ratio test of rho=0: chibar2(01) = 45.38 Prob >= chibar2 = 0.000

89 . est store m13

90 . xtlogit intervention c.l1expabgleln##c.colhist c.idealpointdistance comlang\_ethn  
> werbal logdistance Oil l1polity2 l1rgdp96pcalog ethnic01 intense000 refugee  
> ear>1980 & formercolony==1, i(confyear) nolog

|                                        |                    |   |        |
|----------------------------------------|--------------------|---|--------|
| Random-effects logistic regression     | Number of obs      | = | 67646  |
| Group variable: <b>confyear</b>        | Number of groups   | = | 533    |
| Random effects u_i ~ <b>Gaussian</b>   | Obs per group: min | = | 34     |
|                                        | avg                | = | 126.9  |
|                                        | max                | = | 168    |
| Integration method: <b>mvaghermite</b> | Integration points | = | 12     |
|                                        | Wald chi2(13)      | = | 316.61 |
| Log likelihood = -499.0643             | Prob > chi2        | = | 0.0000 |

| intervention             | Coef.     | Std. Err. | z     | P> z  | [95% Conf. Int |     |
|--------------------------|-----------|-----------|-------|-------|----------------|-----|
| l1expabgleln             | .2610092  | .0618134  | 4.22  | 0.000 | .1398572       | .3  |
| colhist                  | 3.735605  | .6036102  | 6.19  | 0.000 | 2.552551       | 4   |
| c.l1expabgleln#c.colhist | -.6847561 | .1915298  | -3.58 | 0.000 | -1.060148      | -.3 |
| idealpointdistance       | .5839554  | .1249054  | 4.68  | 0.000 | .3391453       | .8  |

Likelihood-ratio test of rho=0: chibar2(01) = **39.01** Prob >= chibar2 = **0.000**

```
92 . xtlogit intervention l1impabgleln colhist##c.idealpointdistance comlang_ethno
> erbal logdistance Oil l1polity2 l1rgdp96pcalog ethnic01 intense000 refugees
> ar>1980 & formercolony==1, i(confyear) nolog
```

[illegible]

|                |   |                   |               |   |               |
|----------------|---|-------------------|---------------|---|---------------|
| Log likelihood | = | <b>-495.04721</b> | Wald chi2(13) | = | <b>276.52</b> |
|                |   |                   | Prob > chi2   | = | <b>0.0000</b> |

Wednesday, May 11, 2016 at 1:20 PM Page 28

```
93 . est store m15
```

|                |              |               |          |
|----------------|--------------|---------------|----------|
| Log likelihood | = -506.95816 | Wald chi2(13) | = 304.79 |
|                |              | Prob > chi2   | = 0.0000 |

| intervention         | Coef.     | Std. Err. | z      | P> z  | [95% Conf. Interva |         |
|----------------------|-----------|-----------|--------|-------|--------------------|---------|
| llexpabgleln         | .20365    | .0603195  | 3.38   | 0.001 | .0854259           | .3218   |
| 1.colhist            | 2.143884  | .8547419  | 2.51   | 0.012 | .4686209           | 3.8191  |
| idealpointdistance   | .6268022  | .1264548  | 4.96   | 0.000 | .3789553           | .8746   |
| colhist#             |           |           |        |       |                    |         |
| c.idealpointdistance |           |           |        |       |                    |         |
| 1                    | -.2444784 | .3933026  | -0.62  | 0.534 | -1.015337          | .52638  |
| comlang_ethno        | .9327001  | .2798862  | 3.33   | 0.001 | .3841331           | 1.4812  |
| llpowerbal           | -.9871871 | .0849102  | -11.63 | 0.000 | -1.153608          | -.82076 |
| logdistance          | -1.267949 | .2031052  | -6.24  | 0.000 | -1.666028          | -.86987 |
| Oil                  | .5292904  | .4157731  | 1.27   | 0.203 | -.2856099          | 1.3441  |

|                |           |          |       |       |           |        |
|----------------|-----------|----------|-------|-------|-----------|--------|
| llpolity2      | .003555   | .0299805 | 0.12  | 0.906 | -.0552057 | .06231 |
| llrgdp96pcalog | .2895617  | .3003975 | 0.96  | 0.335 | -.2992067 | .878   |
| ethnic01       | -.4668813 | .3427757 | -1.36 | 0.173 | -1.138709 | .20494 |
| intense000     | .0002656  | .0003061 | 0.87  | 0.386 | -.0003343 | .00086 |
| refugees       | .974956   | .36792   | 2.65  | 0.008 | .253846   | 1.6960 |
| _cons          | -3.340031 | 2.966563 | -1.13 | 0.260 | -9.154387 | 2.4743 |
|                |           |          |       |       |           |        |
| /lnsig2u       | 1.097009  | .3183651 |       |       | .4730251  | 1.7209 |
|                |           |          |       |       |           |        |
| sigma_u        | 1.730663  | .2754914 |       |       | 1.266823  | 2.3643 |
| rho            | .4765576  | .0794163 |       |       | .3278727  | .62951 |

Likelihood-ratio test of rho=0: chibar2(01) = **39.56** Prob >= chibar2 = **0.000**

```
95 . est store m16
```

```
96 . xtlogit intervention llimpabgleln c.idealpointdistance colhist##c.comlang_et
> powerbal logdistance Oil l1polity2 l1rgdp96pcalog ethnic01 intense000 refug
> year>1980 & formercolony==1, i(confyyear) nolog
```

```
Random-effects logistic regression      Number of obs   =      67646
Group variable: confyear              Number of groups =       533
```

```
Random effects u_i ~ Gaussian
```

|                      |       |
|----------------------|-------|
| Obs per group: min = | 34    |
| avg =                | 126.9 |
| max =                | 168   |

Integration method: **mvaghermite**                      Integration points =                      **12**

|                |              |               |   |        |
|----------------|--------------|---------------|---|--------|
| Log likelihood | = -493.79271 | Wald chi2(13) | = | 282.82 |
|                |              | Prob > chi2   | = | 0.0000 |

| intervention            | Coef.     | Std. Err. | z      | P> z  | [95% Conf. Inte |      |
|-------------------------|-----------|-----------|--------|-------|-----------------|------|
| l1impabgleln            | .4058048  | .0726676  | 5.58   | 0.000 | .2633789        | .54  |
| idealpointdistance      | .5370263  | .1213596  | 4.43   | 0.000 | .2991659        | .77  |
| 1.colhist               | 1.76837   | .4417335  | 4.00   | 0.000 | .9025886        | 2.6  |
| comlang_ethno           | 1.047578  | .2999482  | 3.49   | 0.000 | .4596899        | 1.6  |
| colhist#c.comlang_ethno |           |           |        |       |                 |      |
| 1                       | -1.189516 | .6595159  | -1.80  | 0.071 | -2.482143       | .10  |
| l1powerbal              | -.9623045 | .0861443  | -11.17 | 0.000 | -1.131144       | -.79 |
| logdistance             | -1.250214 | .2133381  | -5.86  | 0.000 | -1.668349       | -.8  |
| Oil                     | .6024188  | .4266138  | 1.41   | 0.158 | -.233729        | 1.4  |
| l1polity2               | -.0042995 | .0304387  | -0.14  | 0.888 | -.0639584       | .05  |
| l1rgdp96pcalog          | -.0637961 | .3164383  | -0.20  | 0.840 | -.6840038       | .55  |
| ethnic01                | -.3885989 | .3498574  | -1.11  | 0.267 | -1.074307       | .2   |

|            |           |          |       |       |           |     |
|------------|-----------|----------|-------|-------|-----------|-----|
| intense000 | .0002192  | .0003141 | 0.70  | 0.485 | -.0003964 | .00 |
| refugees   | .9235018  | .3751489 | 2.46  | 0.014 | .1882235  | 1.  |
| _cons      | -1.486798 | 3.087104 | -0.48 | 0.630 | -7.537411 | 4.5 |
| /lnsig2u   | 1.219472  | .3030344 |       |       | .6255356  | 1.8 |
| sigma_u    | 1.839946  | .2787834 |       |       | 1.367204  | 2.4 |
| rho        | .5071556  | .0757431 |       |       | .3623193  | .65 |

Likelihood-ratio test of rho=0: chibar2(01) = **46.34** Prob >= chibar2 = **0.000**

```
97 . est store m17
```

```
98 . xtlogit intervention    llexpabgleln    c.idealpointdistance    colhist##c.comlang_et
> powerbal logdistance      Oil l1polity2 l1rgdp96pcalog    ethnic01 intense000 refug
> year>1980 & formercolony==1, i(confyear) nolog
```

|                                    |                  |   |              |
|------------------------------------|------------------|---|--------------|
| Random-effects logistic regression | Number of obs    | = | <b>67646</b> |
| Group variable: <b>confyear</b>    | Number of groups | = | <b>533</b>   |

```
Random effects u_i ~ Gaussian
```

|                |       |       |
|----------------|-------|-------|
| Obs per group: | min = | 34    |
|                | avg = | 126.9 |
|                | max = | 168   |

```
Integration method: mvaghermite           Integration points =      12
```

|                |              |               |          |
|----------------|--------------|---------------|----------|
| Log likelihood | = -505.44475 | Wald chi2(13) | = 312.08 |
|                |              | Prob > chi2   | = 0.0000 |

| intervention            | Coef.     | Std. Err. | z      | P> z  | [95% Conf. Inte |      |
|-------------------------|-----------|-----------|--------|-------|-----------------|------|
| llexpabgleln            | .2020315  | .0603665  | 3.35   | 0.001 | .0837154        | .32  |
| idealpointdistance      | .5989054  | .1234996  | 4.85   | 0.000 | .3568507        | .84  |
| 1.colhist               | 2.206179  | .4244905  | 5.20   | 0.000 | 1.374193        | 3.0  |
| comlang_ethno           | 1.123904  | .294676   | 3.81   | 0.000 | .5463497        | 1.7  |
| colhist#c.comlang_ethno |           |           |        |       |                 |      |
| 1                       | -1.183802 | .641548   | -1.85  | 0.065 | -2.441213       | .07  |
| 11powerbal              | -.983527  | .0837661  | -11.74 | 0.000 | -1.147706       | -.81 |
| logdistance             | -1.218071 | .2037931  | -5.98  | 0.000 | -1.617498       | -.81 |
| Oil                     | .6031656  | .4146309  | 1.45   | 0.146 | -.2094961       | 1.4  |
| 11polity2               | -.001195  | .0299478  | -0.04  | 0.968 | -.0598916       | .05  |
| 11rgdp96pcalog          | .2922288  | .2978064  | 0.98   | 0.326 | -.2914611       | .87  |
| ethnic01                | -.4255219 | .3407422  | -1.25  | 0.212 | -1.093364       | .24  |
| intense000              | .0002334  | .0003032  | 0.77   | 0.442 | -.0003609       | .00  |
| refugees                | .9099157  | .3656651  | 2.49   | 0.013 | .1932253        | 1.6  |
| cons                    | -3.72846  | 2.969871  | -1.26  | 0.209 | -9.549301       | 2.0  |

|          |          |          |          |     |
|----------|----------|----------|----------|-----|
| /lnsig2u | 1.072742 | .3182677 | .4489491 | 1.6 |
| sigma_u  | 1.709791 | .2720856 | 1.251665 | 2.3 |
| rho      | .470508  | .0792901 | .3225892 | .62 |

Likelihood-ratio test of rho=0: chibar2(01) = **38.80** Prob >= chibar2 = **0.000**

99 . est store m18

100 .  
end of do-file

101 .



```

1 . *****
2 . // Appendix J: adding france as opposed to all major powers
3 . *****
4 .
5 . xtlogit intervention      fra c.lltrade_gleln##colhist c.idealpointdistance comla
>   Oil llpolity2 llrgdp96pcalog ethnic01 intense000 refugees if year>1980 & forme

```

```

Random-effects logistic regression      Number of obs      =      67646
Group variable: confyear              Number of groups    =      533

```

```

Random effects u_i ~ Gaussian          Obs per group: min =      34
                                           avg =      126.9
                                           max =      168

```

```

Integration method: mvaghermite        Integration points =      12

```

```

                                           Wald chi2(14)      =      288.14
Log likelihood = -489.84826              Prob > chi2        =      0.0000

```

| intervention            | Coef.     | Std. Err. | z      | P> z  | [95% Conf. Inte |      |
|-------------------------|-----------|-----------|--------|-------|-----------------|------|
| fra                     | .7989893  | .3630589  | 2.20   | 0.028 | .0874071        | 1.5  |
| lltrade_gleln           | .3879522  | .0690878  | 5.62   | 0.000 | .2525426        | .52  |
| 1.colhist               | 4.237565  | .8851125  | 4.79   | 0.000 | 2.502776        | 5.9  |
| colhist#c.lltrade_gleln |           |           |        |       |                 |      |
| 1                       | -.6709565 | .1912945  | -3.51  | 0.000 | -1.045887       | -.29 |
| idealpointdistance      | .4971376  | .1261986  | 3.94   | 0.000 | .2497928        | .74  |
| comlang_ethno           | .9562315  | .2796154  | 3.42   | 0.001 | .4081953        | 1.5  |
| llpowerbal              | -.9508044 | .0873243  | -10.89 | 0.000 | -1.121957       | -.7  |
| logdistance             | -1.311965 | .2094951  | -6.26  | 0.000 | -1.722568       | -.90 |
| Oil                     | .4983814  | .4224491  | 1.18   | 0.238 | -.3296036       | 1.3  |
| llpolity2               | -.0095511 | .0302817  | -0.32  | 0.752 | -.0689022       |      |
| llrgdp96pcalog          | .0602198  | .3058267  | 0.20   | 0.844 | -.5391895       | .65  |
| ethnic01                | -.3939492 | .3451175  | -1.14  | 0.254 | -1.070367       | .28  |
| intense000              | .0002736  | .0003105  | 0.88   | 0.378 | -.0003349       | .00  |
| refugees                | .917462   | .3670323  | 2.50   | 0.012 | .1980918        | 1.6  |
| _cons                   | -1.935552 | 2.998425  | -0.65  | 0.519 | -7.812357       | 3.9  |
| /lnsig2u                | 1.165515  | .3041196  |        |       | .5694517        | 1.7  |
| sigma_u                 | 1.79097   | .2723346  |        |       | 1.329398        | 2.4  |
| rho                     | .4936673  | .0760177  |        |       | .3494641        | .63  |

```

Likelihood-ratio test of rho=0: chibar2(01) =      43.61 Prob >= chibar2 = 0.000

```

```

6 . est store m19

```

```

7 . xtlogit intervention      fra  c.lltrade_gleln c.colhist##c.idealpointdistance  com
>      Oil llpolity2 llrgdp96pcalog  ethnic01 intense000 refugees  if year>1980 & for

```

```

Random-effects logistic regression              Number of obs      =      67646
Group variable: confyear                     Number of groups   =       533

Random effects u_i ~ Gaussian                Obs per group: min =       34
                                              avg =      126.9
                                              max =      168

Integration method: mvaghermite              Integration points =       12

Wald chi2(14)                                =      280.92
Log likelihood = -496.05612                   Prob > chi2        =      0.0000

```

| intervention                   | Coef.     | Std. Err. | z      | P> z  | [95% Con  |
|--------------------------------|-----------|-----------|--------|-------|-----------|
| fra                            | .6137201  | .3742572  | 1.64   | 0.101 | -.1198104 |
| lltrade_gleln                  | .3458292  | .0681934  | 5.07   | 0.000 | .2121727  |
| colhist                        | 1.902418  | .9233689  | 2.06   | 0.039 | .0926485  |
| idealpointdistance             | .5298271  | .1276568  | 4.15   | 0.000 | .2796244  |
| c.colhist#c.idealpointdistance | -.3481822 | .4284517  | -0.81  | 0.416 | -1.187932 |
| comlang_ethno                  | .8743372  | .2854177  | 3.06   | 0.002 | .3149287  |
| llpowerbal                     | -.9659038 | .0877382  | -11.01 | 0.000 | -1.137867 |
| logdistance                    | -1.290786 | .2123463  | -6.08  | 0.000 | -1.706977 |
| Oil                            | .4303119  | .4320429  | 1.00   | 0.319 | -.4164767 |
| llpolity2                      | .0021677  | .0307785  | 0.07   | 0.944 | -.0581571 |
| llrgdp96pcalog                 | .0357363  | .3151177  | 0.11   | 0.910 | -.5818832 |
| ethnic01                       | -.5014836 | .3551127  | -1.41  | 0.158 | -1.197492 |
| intense000                     | .0002782  | .0003188  | 0.87   | 0.383 | -.0003467 |
| refugees                       | .9810727  | .3788747  | 2.59   | 0.010 | .238492   |
| _cons                          | -1.854834 | 3.076421  | -0.60  | 0.547 | -7.884509 |
| /lnsig2u                       | 1.250401  | .3049429  |        |       | .6527235  |
| sigma_u                        | 1.86862   | .2849112  |        |       | 1.385917  |
| rho                            | .5148839  | .0761682  |        |       | .3686241  |

Likelihood-ratio test of rho=0: chibar2(01) = 46.54 Prob >= chibar2 = 0.000

```

8 . est store m20

```

```

9 . xtlogit intervention      fra  c.lltrade_gleln c.idealpointdistance  c.comlang_ethn
>      Oil llpolity2 llrgdp96pcalog  ethnic01 intense000 refugees  if year>1980 & f

```

```

Random-effects logistic regression      Number of obs      =      67646
Group variable: conyear              Number of groups   =       533

Random effects u_i ~ Gaussian        Obs per group: min =       34
                                      avg =      126.9
                                      max =      168

Integration method: mvaghermite      Integration points =       12

Wald chi2(14) =      289.87
Log likelihood = -494.48947          Prob > chi2       =      0.0000

```

| intervention              | Coef.     | Std. Err. | z      | P> z  | [95% Conf. In |      |
|---------------------------|-----------|-----------|--------|-------|---------------|------|
| fra                       | .6766484  | .3722699  | 1.82   | 0.069 | -.0529871     | 1    |
| lltrade_gleln             | .3409046  | .0678681  | 5.02   | 0.000 | .2078856      | .    |
| idealpointdistance        | .5003223  | .1251171  | 4.00   | 0.000 | .2550974      | .    |
| comlang_ethno             | 1.06652   | .2983756  | 3.57   | 0.000 | .4817148      | 1    |
| colhist                   | 1.776548  | .4463282  | 3.98   | 0.000 | .9017604      | 2    |
| c.comlang_ethno#c.colhist | -1.309962 | .676391   | -1.94  | 0.053 | -2.635664     |      |
| llpowerbal                | -.9625198 | .0866328  | -11.11 | 0.000 | -1.132317     | -. . |
| logdistance               | -1.24211  | .2127479  | -5.84  | 0.000 | -1.659088     | -. . |
| Oil                       | .5051597  | .42846    | 1.18   | 0.238 | -.3346064     | 1    |
| llpolity2                 | -.0030464 | .0305878  | -0.10  | 0.921 | -.0629973     | .    |
| llrgdp96pcalog            | .0560228  | .3115505  | 0.18   | 0.857 | -.554605      | .    |
| ethnic01                  | -.447467  | .3518036  | -1.27  | 0.203 | -1.136989     | .    |
| intense000                | .0002483  | .000314   | 0.79   | 0.429 | -.0003672     | .    |
| refugees                  | .9097235  | .3757077  | 2.42   | 0.015 | .17335        | 1    |
| _cons                     | -2.339795 | 3.074569  | -0.76  | 0.447 | -8.36584      |      |
| /lnsig2u                  | 1.212622  | .3050445  |        |       | .6147458      | 1    |
| sigma_u                   | 1.833655  | .2796732  |        |       | 1.359848      | 2    |
| rho                       | .5054434  | .0762521  |        |       | .3598301      | .    |

Likelihood-ratio test of rho=0: chibar2(01) = **45.22** Prob >= chibar2 = **0.000**

10 . est store m21

```

11 . *****
12 . // Appendix K: lagging trade by 2 and 3 years, (since 1980)
13 . *****
14 .
15 . xtlogit intervention      c.l2tradeln##colhist c.idealpointdistance comlang_ethno
    > polity2 llrgdp96pcalog ethnic01 intense000 refugees if year>1980 & formercolony=

```

Random-effects logistic regression  
Group variable: **confyear**

Number of obs = **52464**  
Number of groups = **474**

Random effects u\_i ~ **Gaussian**

Obs per group: min = **15**  
avg = **110.7**  
max = **183**

Integration method: **mvaghermite**

Integration points = **12**

Log likelihood = **-394.13558**

Wald chi2(13) = **220.31**  
Prob > chi2 = **0.0000**

| intervention        | Coef.     | Std. Err. | z     | P> z  | [95% Conf. Interval |          |
|---------------------|-----------|-----------|-------|-------|---------------------|----------|
| l2tradeln           | .2940287  | .0777979  | 3.78  | 0.000 | .1415475            | .446509  |
| l.colhist           | 4.588226  | 1.124935  | 4.08  | 0.000 | 2.383394            | 6.79305  |
| colhist#c.l2tradeln |           |           |       |       |                     |          |
| 1                   | -.6393812 | .2413338  | -2.65 | 0.008 | -1.112387           | -.166375 |
| idealpointdistance  | .8164874  | .1542183  | 5.29  | 0.000 | .5142252            | 1.1187   |
| comlang_ethno       | 1.029975  | .3163309  | 3.26  | 0.001 | .4099782            | 1.64997  |
| llpowerbal          | -1.055151 | .1140464  | -9.25 | 0.000 | -1.278678           | -.831623 |
| logdistance         | -1.429761 | .2516178  | -5.68 | 0.000 | -1.922922           | -.936598 |
| Oil                 | .3670791  | .4859864  | 0.76  | 0.450 | -.5854368           | 1.31959  |
| llpolity2           | -.0026084 | .0321758  | -0.08 | 0.935 | -.0656719           | .06045   |
| llrgdp96pcalog      | .3279282  | .3372576  | 0.97  | 0.331 | -.3330846           | .98894   |
| ethnic01            | -.1797195 | .3797169  | -0.47 | 0.636 | -.9239509           | .564511  |
| intense000          | .0002671  | .0003376  | 0.79  | 0.429 | -.0003946           | .000928  |
| refugees            | 1.090858  | .4097337  | 2.66  | 0.008 | .2877952            | 1.89392  |
| _cons               | -3.800859 | 3.354041  | -1.13 | 0.257 | -10.37466           | 2.77294  |
| /lnsig2u            | 1.210241  | .3443073  |       |       | .5354113            | 1.88507  |
| sigma_u             | 1.831473  | .3152947  |       |       | 1.306962            | 2.5664   |
| rho                 | .5048483  | .0860687  |       |       | .3417655            | .666905  |

Likelihood-ratio test of rho=0: chibar2(01) = **31.98** Prob >= chibar2 = **0.000**

16 . est store m22

17 . xtlogit intervention c.l3tradeln##colhist c.idealpointdistance comlang\_ethno  
> polity2 llrgdp96pcalog ethnic01 intense000 refugees if year>1980 & formercolony=

Random-effects logistic regression  
Group variable: **confyear**

Number of obs = **51257**  
Number of groups = **468**

Random effects u\_i ~ **Gaussian**

Obs per group: min = **29**

avg = 109.5  
max = 179

Integration method: **mvaghermite**

Integration points = 12

Log likelihood = **-379.10071**

Wald chi2(13) = 221.52  
Prob > chi2 = 0.0000

| intervention        | Coef.     | Std. Err. | z     | P> z  | [95% Conf. Interval |          |
|---------------------|-----------|-----------|-------|-------|---------------------|----------|
| l3tradeln           | .3865163  | .0831587  | 4.65  | 0.000 | .2235283            | .549504  |
| l.colhist           | 6.111917  | 1.20695   | 5.06  | 0.000 | 3.746339            | 8.47749  |
| colhist#c.l3tradeln |           |           |       |       |                     |          |
| 1                   | -1.018284 | .2734366  | -3.72 | 0.000 | -1.554209           | -.482357 |
| idealpointdistance  | .7821995  | .1616113  | 4.84  | 0.000 | .4654473            | 1.09895  |
| comlang_ethno       | .9993661  | .3185732  | 3.14  | 0.002 | .3749742            | 1.62375  |
| llpowerbal          | -1.017004 | .113793   | -8.94 | 0.000 | -1.240034           | -.793973 |
| logdistance         | -1.486613 | .2602935  | -5.71 | 0.000 | -1.996778           | -.976446 |
| Oil                 | .2769254  | .4793518  | 0.58  | 0.563 | -.6625868           | 1.21643  |
| llpolity2           | -.0003444 | .0311597  | -0.01 | 0.991 | -.0614163           | .060727  |
| llrgdp96pcalog      | .1397897  | .3328165  | 0.42  | 0.674 | -.5125186           | .79209   |
| ethnic01            | -.0476223 | .3735093  | -0.13 | 0.899 | -.779687            | .684442  |
| intense000          | .0002586  | .0003271  | 0.79  | 0.429 | -.0003825           | .000899  |
| refugees            | 1.060183  | .3979119  | 2.66  | 0.008 | .28029              | 1.84007  |
| _cons               | -2.039311 | 3.320639  | -0.61 | 0.539 | -8.547644           | 4.46902  |
| /lnsig2u            | 1.087461  | .3618709  |       |       | .3782069            | 1.79671  |
| sigma_u             | 1.72242   | .3116469  |       |       | 1.208166            | 2.45556  |
| rho                 | .4741763  | .0902264  |       |       | .3073281            | .646997  |

Likelihood-ratio test of rho=0: chibar2(01) = 26.25 Prob >= chibar2 = 0.000

18 . est store m23
